14. Swenson ER, Maren TH: A quantitative analysis of CO<sub>2</sub> transport at rest and during maximal exercise. *Respir Physiol* 1978; 35:129–59
15. Longmuir IS, Forster RE, Woo CY: Diffusion of carbon dioxide through thin layers of solutions. *Nature* 1966; 209:383–4
16. Ward WJ 3rd, Robb WL: Carbon dioxide–oxygen separation: Facilitated transport of carbon dioxide across a liquid film. *Science* 1967; 156:1481–4
17. Enns T: Facilitation by carbonic anhydrase of carbon dioxide transport. *Science* 1967; 155:44–7
18. Gros G, Moll W: The diffusion of carbon dioxide in erythrocytes and hemoglobin solutions. *Pflugers Arch* 1971; 324:249–66
19. Gros G, Moll W: Facilitated diffusion of CO<sub>2</sub> across albumin solutions. *J Gen Physiol* 1974; 64:356–71
20. Gros G, Moll W, Hoppe H, Gros H: Proton transport by phosphate diffusion—A mechanism of facilitated CO<sub>2</sub> transfer. *J Gen Physiol* 1976; 67:773–90
21. Gutknecht J, Bisson MA, Tosteson FC: Diffusion of carbon dioxide through lipid bilayer membranes: Effects of carbonic anhydrase, bicarbonate, and unstirred layers. *J Gen Physiol* 1977; 69:779–94
22. Lindskog S, Silverman DN: The catalytic mechanism of mammalian carbonic anhydrases. *EXS* 2000; 90:175–95
23. Swenson ER: Pharmacology of acute mountain sickness: Old drugs and newer thinking. *J Appl Physiol* (1985) 2016; 120:204–15
24. Endeward V, Al-Samir S, Itel F, Gros G: How does carbon dioxide permeate cell membranes? A discussion of concepts, results and methods. *Front Physiol* 2014; 4:382

## ANESTHESIOLOGY REFLECTIONS FROM THE WOOD LIBRARY-MUSEUM

### Charles Halpine or How Chloroform Killed Simultaneously a General and a Private

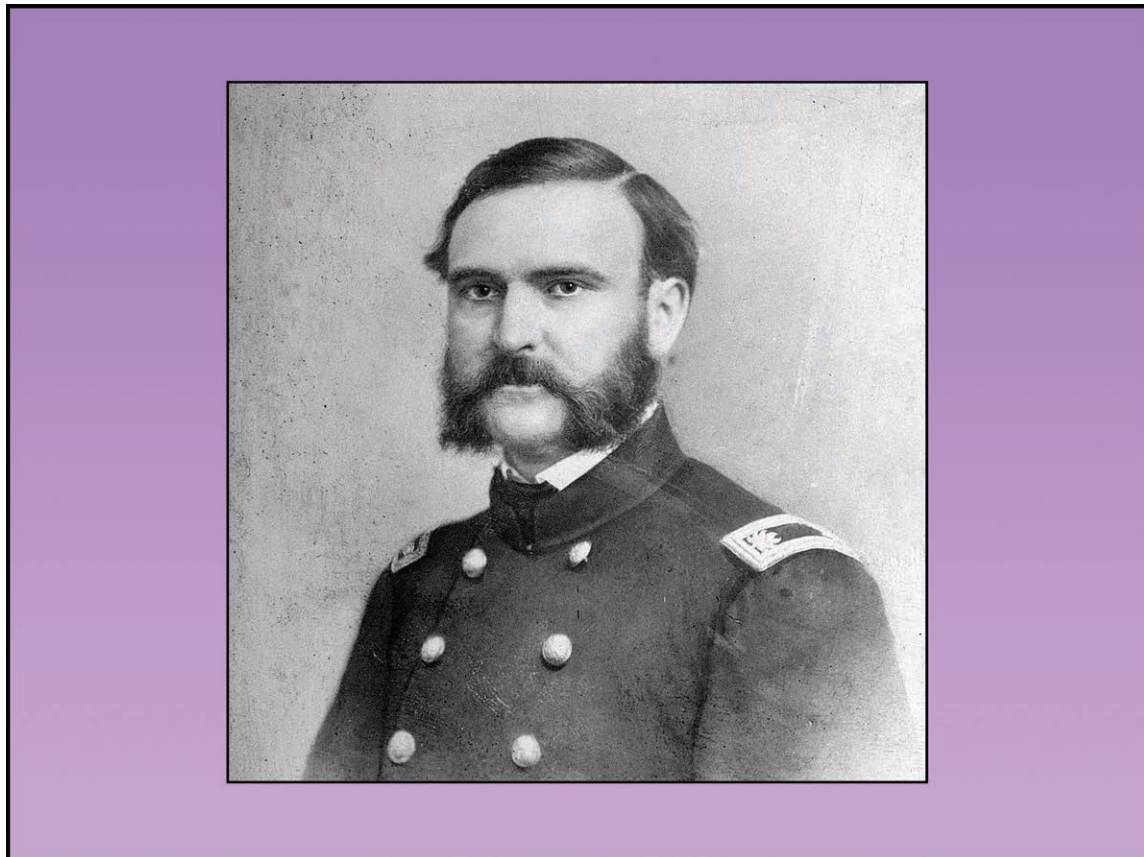

Born in Oldcastle, County Meath, Ireland, Charles Graham Halpine (1825 to 1868) emigrated to the United States in 1851. He worked as a journalist and editor in Boston, Washington, D.C., and then New York City, before joining the Union's 69th New York Volunteer Infantry. During the Civil War, he penned poetry and prose for periodicals and eventually books under the pseudonym of "Miles O'Reilly," a hapless Irish private in the "47th Regiment New York Volunteers." Progressively reassigned and promoted through the ranks, Halpine was photographed (above) as a lieutenant colonel. By the time Halpine resigned his commission, he had been brevetted to brigadier general for merit. In August of 1868, while self-administering his own remedy for insomnia and migraines, 43-yr-old Halpine accidentally overdosed on undiluted chloroform. And that is how chloroform killed simultaneously a general (Halpine) and a private (O'Reilly). (Copyright © the American Society of Anesthesiologists' Wood Library-Museum of Anesthesiology.)

George S. Bause, M.D., M.P.H., Honorary Curator and Laureate of the History of Anesthesia, Wood Library-Museum of Anesthesiology, Schaumburg, Illinois, and Clinical Associate Professor, Case Western Reserve University, Cleveland, Ohio. UJYC@aol.com.
